# Left in the cold? Evolutionary origin of *Laternula elliptica*, a keystone bivalve species of Antarctic benthos

JOHN D. TAYLOR<sup>1\*</sup>, EMILY A. GLOVER<sup>1</sup>, ELIZABETH M. HARPER<sup>2</sup>,  
J. ALISTAIR CRAME<sup>3</sup>, CHIHO IKEBE<sup>1</sup> and SUZANNE T. WILLIAMS<sup>1</sup>

<sup>1</sup>Life Sciences, The Natural History Museum, London SW7 5BD, UK

<sup>2</sup>Department of Earth Sciences, University of Cambridge, Cambridge CB2 3EQ, UK

<sup>3</sup>British Antarctic Survey, Cambridge CB3 0ET, UK

Received 8 September 2017; revised 23 October 2017; accepted for publication 23 October 2017

The large, burrowing bivalve *Laternula elliptica* is an abundant component of shallow-water soft-substrate communities around Antarctica but its congeners are temperate and tropical in distribution and their phylogenetic relationships are obscure. A new molecular analysis of Laternulidae species shows that there are two distinct clades, one of *Exolaternula* species, *E. spengleri* and *E. liautaudi*, possessing a ligamental lithodesma and a larger clade of species lacking the lithodesma. Of the latter, *Laternula elliptica* is a sister taxon to temperate and tropical species, including those that live around the coasts of Australia from Tasmania to Darwin. It is suggested that *L. elliptica* was left isolated around Antarctica following the opening of the Tasman Gateway and initiation of the Circum-Antarctic Current as Australia drifted northwards following the final breakup of Gondwana. A further scenario is that as Australia moved closer to Asia, species spread into tropical habitats and more widely to the Red Sea and Japan. *Exolaternula* species have a likely Tethyan origin and the present-day range is from the Arabian Gulf, around southern Asia and as far north as southern Russia.

ADDITIONAL KEYWORDS: Anomalodesmata – biogeography – Laternulidae – phylogeny

## INTRODUCTION

Although the precise origins of the modern Antarctic marine fauna are undoubtedly complex, there has always been a distinct impression that certain elements within it are both of considerable antiquity and endemic to the southern high latitudes (Lipps & Hickman, 1982; Clarke & Crame, 1989). In all probability these taxa date back to at least the Late Cretaceous – Early Palaeogene, a time when the southern margins of the Gondwana supercontinent were still more or less intact, and polar climates were significantly warmer than those of today. Zinsmeister's (1982) extensive shallow marine Weddellian Province, stretching from southern Patagonia through western Antarctica to New Zealand and eastern Australia, was established on the basis of various endemic molluscan families, one of which, the Struthiolariidae (Littorinimorpha;

Stromboidea), still occurs in the region (Beu, 2009). As our knowledge of both the fossil record and the molecular phylogenetics of Antarctic marine taxa has steadily improved, it is becoming appropriate to ask how certain specific elements within the fauna may have evolved. Do their roots lie in some form of ancestral Weddellian province, or were they more recent immigrants? This sort of question is particularly apposite for the very common infaunal bivalve *Laternula elliptica* (Anomalodesmata; Laternulidae), as its congeners can be traced northwards through temperate South Australia into the heart of the tropical Indo-Pacific realm, and then northwards again into the temperate North-West Pacific. Is this a genus that spread either into or out of Antarctica, and if so, when?

*Laternula elliptica* (King, 1832) is a large (> 100 mm) infaunal bivalve abundant in shallow water and even intertidal habitats around the Antarctic continent and sub-Antarctic islands (Fig. 1A–C). Its abundance and prominence in benthic communities, and its rank as a keystone species by Harper *et al.* (2012), has attracted

\*Corresponding author. E-mail: j.taylor@nhm.ac.uk

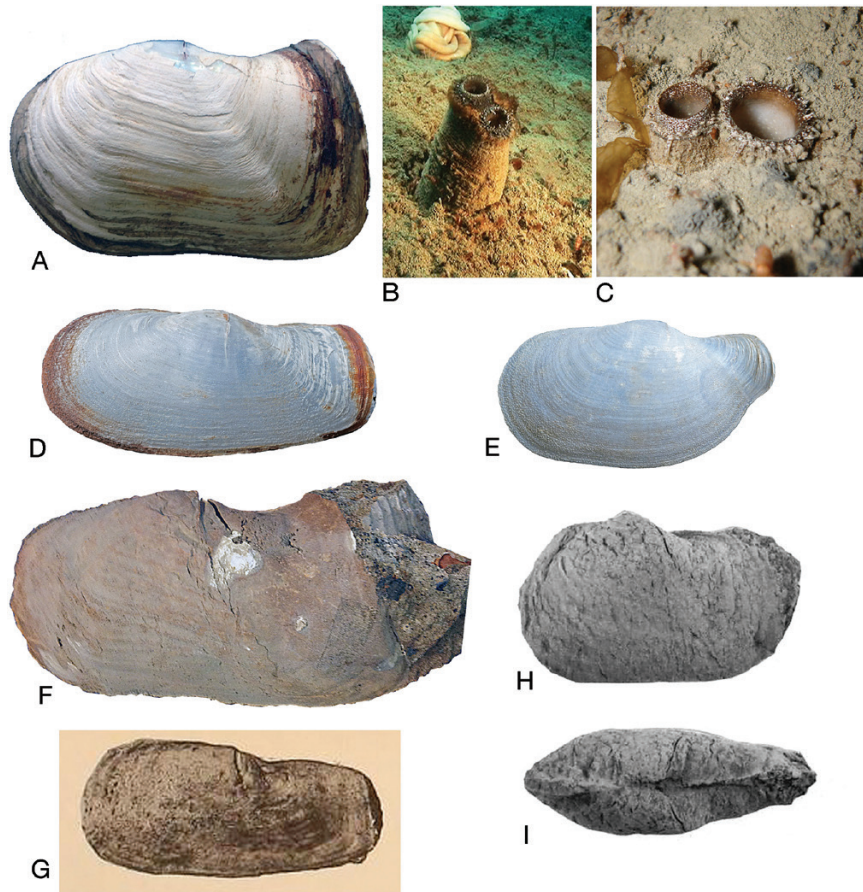

**Figure 1.** *Laternula elliptica*, type species of *Exolaternula* and *Laternula*, and fossil *Laternulidae*. A. *Laternula elliptica* (King, 1832), James Ross Island, Antarctica (NHMUK), L = 69 mm. B, C. *Laternula elliptica*, in life position with fused inhalant and exhalant siphons. Images by David Cothran/Lindblad Expeditions, All Rights Reserved. D. *Exolaternula spengleri* (Gmelin, 1792) (senior synonym of *A. truncata*, *A. rostrata*), Port Essington, Australia (NHMUK), L = 78.4 mm. E. *Laternula anatina* (Linnaeus, 1758), Moluccas (NHMUK), L = 55.2 mm. F. *Laternula elliptica*, Early Pliocene, Cockburn Island Formation, Cockburn Island, north-eastern Antarctic Peninsula (BAS DJ. 351.21), L = 138 mm. G. *Laternula burdigalensis* (Cossmann & Peyrot, 1909), Miocene, Salles, France, L = 80 mm (from Cossmann & Peyrot, 1909). H, I. *Laternula* sp., Eocene, Rio Turbio Formation, Patagonia, Argentina, L = 50 mm, from Griffin (1991) with permission *Journal of Paleontology*.

considerable research interest with a multitude of publications investigating many aspects of its biology and ecology. A few examples include: physiology (Morley *et al.*, 2009, 2012), biochemistry (González & Puntarulo, 2011), reproduction (Kang, Ahn & Choi, 2003), growth rates (Ralph & Maxwell, 1977; Brey *et al.*, 2011), burrowing behaviour (Peck *et al.*, 2009), trace metals (Ahn *et al.*, 1996), shell microstructure and mineralogy (Sato-Okoshi & Okoshi, 2008; Nehrke *et al.*, 2012), ice scour damage (Harper *et al.*, 2012) and proteomics (Clark *et al.*, 2010).

Outside of the Southern Ocean, *Laternula* species range from the southern temperate zone (Tasmania) through subtropical and tropical Australia, south-eastern Asia, Philippines, China and Japan as

far north as Peter the Great Bay in western Russia; and to the west through the northern Indian Ocean, Arabian Gulf, Red Sea and, rarely, to East Africa, but they are absent from oceanic islands. One species, *L. liautaudi*, is exotic to west coast USA (Miller, Coan & Chapman, 1999 as *L. marilina*; or *L. gracilis* Fofonoff *et al.*, 2017) and another, *L. anatina*, to the eastern Mediterranean (Gofas & Zenetos, 2003). The genus is particularly speciose around Australia from where 12 nominal species have been described or recorded.

By contrast to the research focus on *L. elliptica*, there are relatively few studies devoted to the temperate and tropical species of *Laternula* and most aspects of their biology and systematics remain uninvestigated. Exceptions are the morphological and

ecological studies of *Laternula rostrata* by Morton (1973, 1976), Adal & Morton (1973) and Prezant *et al.* (2008), the physiology of species from Singapore and South Australia (Morley *et al.*, 2009; Lai *et al.*, 2011) and China (Zhuang, 2005), and ecological studies on Korean and Japanese species (Kang *et al.*, 2006; Kanaya, Takagi & Kikuchi, 2008).

*Laternula* species have thin, elongate, nacreous and granular prismatic shells, a posterior gape and an external surface covered in short spikes (Checa & Harper, 2010). There is a prominent umbonal slit in the shell with an internal shell buttress posterior to the hinge (Savazzi, 1990). The internal ligament is set on a chondrophore, and an anterior, transverse lithodesma (a calcified ossicle within the ligament) is present in some species. Siphons are long, fused and periostracum-covered (Fig. 1), with distal tentacles and siphonal eyes (Morton, 1973; Adal & Morton, 1973). The ventral mantle is fused, with a small pedal gape, and the foot is small. Arenophilic mantle glands are present on siphons (Sartori, Passos & Domaneschi, 2006) and their sand adherent secretions are present on juvenile shells < 10 mm long (E. M. Harper, unpub. obs). Laternulids live in muddy, intertidal or shallow subtidal habitats, often amongst or near mangroves (Prezant *et al.*, 2008; Lai *et al.*, 2011), in seagrass beds (our personal observations) and frequently in habitats of fluctuating or elevated salinities.

Compared with its lower latitude congeners, *Laternula elliptica* is larger, thicker shelled (Watson *et al.*, 2012; Prezant, Shell & Wu, 2015) and lacks the spikes (spinules) on the shell surface present in all other species. Apart from *L. elliptica*, discrimination of *Laternula* species is extremely confused and misidentifications abound. There is no real agreement on the number of living species; the latest taxonomic account (Huber, 2010) recognized 19 species (20 species in WoRMS, 2017), while previously Lamy (1934) documented 15–20 species and in the best illustrated of the 19<sup>th</sup> century monographs Reeve (1860–1863) illustrated 30 species with 24 of these described as new. The type specimens from Reeve (NHMUK) are a major resource for any taxonomic study of the genus. We agree with Huber (2010) that species depictions and distributional data in many identification guides (e.g. Lamprell & Healy, 1998) and other publications (Morton, 1976) are wrongly assigned and have led to continuing confusion. *Laternula* species have been divided into two subgenera (Habe, 1977) on the basis of the presence (*Exolaternula*) or absence (*Laternula*) of a lithodesma. Nevertheless, the taxonomic or phylogenetic significance of this character has been doubted (Huber, 2010). In a broader context, molecular analyses (Harper, Dreyer & Steiner, 2006; Combosch *et al.*, 2017; Williams *et al.*, 2017) place *Laternula* within the Anomalodesmata in a clade with Lyonsiidae,

Clavagellidae and Pandoridae but distinct from *Cochlodesma* (Periplomatidae) which has a similar umbonal slit but which groups with Thraciidae and Myochamidae.

Clearly, *L. elliptica* is a prominent and ecologically important element in Antarctic benthic faunas but is biogeographically isolated from the warmer water species of the genus. In this study we use a molecular analysis to investigate the phylogenetic relationships of *L. elliptica* to the lower latitude species and evaluate three possible biogeographical scenarios concerning its present isolation in polar seas.

1. Is *L. elliptica* a relict species dating from a former, broader, distributional range of the genus and warmer Antarctic conditions (e.g. during the Early–Middle Eocene) but now isolated by the formation of the Circum-Antarctic Current and has subsequently become physiologically adapted to cold conditions? An expectation arising from this scenario might be that *L. elliptica* is most closely related to the temperate southern Australian species.
2. Another possibility is that *Laternula* species originated on Late Gondwanan shallow shores and rafted northwards with Australia into the tropics after the split from Antarctica c. 30 Mya, leaving *L. elliptica* isolated in the Southern Ocean. This may account for the diversity of *Laternula* species around Australia from temperate conditions around Victoria/Tasmania to tropical waters to the north. *Laternula* species then spread and diversified into tropical Asian shallow-water environments. An expectation would be that *L. elliptica* is sister to all other species or groups with the Australian taxa.
3. A further scenario that matches the ‘out of the tropics’ (OTT) model developed by Jablonski, Roy & Valentine (2006) and Jablonski *et al.* (2013) is that *Laternula* diversified on tropical–subtropical shores and later spread southwards into Antarctica during warmer periods, with *L. elliptica* as a derived species.

## MATERIAL AND METHODS

### MOLECULAR METHODS

The DNA extraction and amplification protocols of Williams *et al.* (2013) were used to amplify portions of four genes from 16 specimens (Table 1). The genes amplified were the nuclear 28S rRNA gene (approximately 1640 bp) and three mitochondrial genes: 12S rRNA gene (approximately 610 bp), 16S rRNA gene (approximately 500 bp) and cytochrome *b* (405 bp). *Lyonsia norwegica* (Lyonsiidae) and *Bryopa lata* (Clavagellidae) were used as outgroups having been shown in previous analyses to be sister groups of Laternulidae (Harper



**Table 1.** Laternulidae species included in the analysis with collection localities, locality codes used in Figure 2, museum registration numbers for vouchers and GenBank accession numbers for the genes sequenced for each taxon

|                                                       | Collection locality                                                | Locality code | Voucher number     | 28S      | cyt B    | 12S      | 16S      |
|-------------------------------------------------------|--------------------------------------------------------------------|---------------|--------------------|----------|----------|----------|----------|
| <i>Exolaternula liautaudi</i> (Mittre, 1844)          | Olga Bay, Eastern Russia, 43°41'56"N, 135°15'04"E                  | OB 1          | NHMUK 20170326     | LT960470 | LT960693 | LT960373 | LT960384 |
| <i>Exolaternula liautaudi</i> (Mittre, 1844)          | Olga Bay, Eastern Russia, 43°41'56"N, 135°15'04"E                  | OB 2          | NHMUK 20170327     | LT960471 | LT960694 | LT960374 | LT960385 |
| <i>Exolaternula liautaudi</i> (Mittre, 1844)          | Kojima-Shinden, Kawasaki, Japan, 35°30'52"N, 139°48'29"E           | KS            | NHMUK 20170328     | LT960472 | LT960695 |          | LT960386 |
| <i>Exolaternula spengleri</i> (Gmelin, 1792)          | Casiguran Bay, Luzon, Philippines, 16°15.95'N, 122°05'E            | LP            | MNHN IM-2007-41446 | LT960473 |          |          | LT960387 |
| <i>Exolaternula spengleri</i> (Gmelin, 1792)          | Sungei Buroh, Singapore, 1°26'39"N, 103°43'39"E                    | SIN           | NHMUK 20160581     | LT960474 | KX815963 | KX815963 | KX815967 |
| <i>Laternula elliptica</i> (King, 1832)               | Rothera Point, Adelaide Island, Antarctica, 67°34'S, 68°08'W       | RO            | no voucher         | LT960475 | KX815959 | KX815959 | KX815959 |
| <i>Laternula elliptica</i> (King, 1832)               | King George Island, South Shetland Islands, 62°09.87'S, 58°33.83'W | SS            | NHMUK 20170329     | LT960476 | LT960696 |          | LT960388 |
| <i>Laternula creccina</i> (Reeve, 1860)               | Esperance, Bandy Creek, W. Australia, 33°49'50"S, 121°56'10"E      | ESP           | NHMUK 20030177     | LT960477 | LT960697 |          | LT960389 |
| <i>Laternula anatina</i> (Linnaeus, 1758)             | Papua New Guinea, near Rempi, stn PR104, 5°5'6"S, 145°48'E         | PNG           | MNHN IM-2013-15152 | LT960478 | LT960698 | LT960375 | LT960390 |
| <i>Laternula japonica</i> (Lischke, 1872)             | Hakata-jima Island, Ehime pref., Japan, 34°12'N, 133°05'E          | HJ            | NHMUK 20170330     | LT960479 |          | LT960376 | LT960391 |
| <i>Laternula</i> cf. <i>bos-chasina</i> (Reeve, 1860) | Ludmilla Creek, Darwin, Australia, 12°24'28"S, 130°50'07"E         | DAR           | NHMUK 20170331     | LT960480 | LT960699 | LT960377 |          |
| <i>Laternula</i> cf. <i>bullata</i> (Reeve, 1860)     | Sungei Buroh, Singapore, 1°26'39"N, 103°43'39"E                    | SIN           | NHMUK 20170332     | LT960481 | LT960700 | LT960378 | LT960392 |
| <i>Laternula</i> sp.                                  | Kungkaben Bay, Thailand, 12°34.42'N, 101°54.24'E                   | KK            | NHMUK 20170333     | LT960482 | LT960701 | LT960379 | LT960393 |

Table 1. Continued

|                                                                                  | Collection locality                                                        | Locality code | Voucher number                         | 28S      | cyt B    | 12S      | 16S      |
|----------------------------------------------------------------------------------|----------------------------------------------------------------------------|---------------|----------------------------------------|----------|----------|----------|----------|
| <i>Laternula</i> cf. <i>corrugata</i> (Reeve, 1863)                              | Denham, Shark Bay, W. Australia, 25°54'11"S, 118°31'16"E                   | SB            | NHMUK 20170334                         | LT960483 | LT960702 | LT960380 | LT960394 |
| <i>Laternula gracilis</i> (Reeve, 1860)                                          | Geelong, Victoria, Australia, 38°9'07"S, 144°23'44"E                       | GE 1          | NHMUK 20170335                         |          | LT960703 | LT960381 | LT960395 |
| <i>Laternula gracilis</i> (Reeve, 1860)                                          | Geelong, Victoria, Australia, 38°9'07"S, 144°23'44"E                       | GE 2          | NHMUK 20170336                         | LT960484 |          | LT960382 | LT960396 |
| <i>Laternula gracilis</i> (Reeve, 1860)                                          | Burrill Lake, NSW, Australia, 35°22'03"S, 150°26'04"E                      | BL            | NHMUK 20170337                         | LT960485 | LT960704 | LT960383 | LT960397 |
| <i>Laternula gracilis</i> (as <i>L. marilina</i> in Taylor <i>et al.</i> , 2007) | N. Stradbroke Island, Moreton Bay, Qld, Australia, 27°24'29"S, 153°24'42"E | MB 1          | NHMUK 29970221                         | AM779661 |          |          |          |
| <i>Laternula gracilis</i> (Reeve, 1860)                                          | N. Stradbroke Island, Moreton Bay, Queensland, Australia                   | MB 2          | <a href="#">Combosch et al. (2017)</a> | KX713395 |          |          | KX713227 |
| <b>Outgroups</b>                                                                 |                                                                            |               |                                        |          |          |          |          |
| <i>Bryopa lata</i> (Broderip, 1834)                                              | Singapore, 1°13.9'N, 103°52'E                                              |               | NHMUK 20160581                         | LT960486 | KX815957 | KX815957 | KX815957 |
| <i>Lyonsia norvegica</i> (Gmelin, 1792)                                          | Tjärno, Sweden, 58°52.42'N, 11°06.18'E                                     |               | NHMUK 20160584                         | LT960487 | KX815960 | KX815960 | KX815960 |

MNHN, Muséum national d'Histoire Naturelle, Paris; NHMUK, The Natural History Museum, London.

*et al.*, 2006; Combosch *et al.*, 2017; Williams *et al.*, 2017). Sequence reactions were performed directly on purified PCR products using the BigDye Terminator v1.1 Cycle Sequencing Kit (Applied Biosystems) and run on an Applied Biosystems 3730 DNA Analyzer automated capillary sequencer. Sequences for each gene fragment were assembled and edited using Sequencher (v.5.1; Gene Codes Corporation).

Mitochondrial genes of another four taxa, *Lyonsia norvegica*, *Bryopa lata*, *Laternula elliptica* (Antarctica) and *Laternula rostrata* (Singapore, herein *E. spengleri*), were previously published as complete, or nearly complete, mitochondrial genomes (Williams *et al.*, 2017) and 12S, 16S and cytB sequence data were taken from these sequences (GenBank accession numbers KX815957, KX815959, KX815960 and KX815963). Sequences for 28S rRNA genes were obtained from the same NGS genomic data set used in Williams *et al.* (2017) to assemble mitochondrial genomes. Briefly, genomic DNA was sequenced on one-fifth of a flowcell on an Illumina MiSeq platform (v.2 chemistry; 2 × 250 paired-end). Reads were analysed and assembled using Geneious (v.8.1.8; <https://www.geneious.com>). The data were trimmed allowing no ambiguous base calls and removing bases from the terminal ends of reads with an error probability of 0.05 or higher (i.e. those with a greater than 5% chance of being incorrect). The trimmed reads were first assembled *de novo* and the resulting contigs were interrogated against the NCBI database, using BLAST (Altschul *et al.* 1990), in order to identify ribosomal gene sequences. Gene boundaries were determined by comparison with other molluscan taxa. Coverage data are available in Williams *et al.* (2017).

Phylogenetic datasets analysed included three individual gene datasets and a combined gene dataset including all individuals that had sequences for at least three genes. Alignment of cytB sequences was unambiguous and no stop codons were observed. Sequences of ribosomal genes were aligned in Geneious (v.8.1.8) using ClustalW. Poorly aligned sites in the ribosomal gene alignments were identified using the online Gblock server using all three options for a less stringent selection (v.0.91b; Castresana, 2000, [http://molevol.cmima.csic.es/castresana/Gblocks\\_server.html](http://molevol.cmima.csic.es/castresana/Gblocks_server.html)) and removed from alignments. After removal of ambiguously aligned blocks of data, a total of 2922 bp of aligned sequence remained to be used in phylogenetic analyses for the combined gene dataset (90% of the original 3241 positions). In individual analyses, alignment lengths after Gblocks were 444 bp of sequence from 16S rRNA (89% of 495 bp in the original alignment), 539 bp of 12S rRNA (90% of 597 bp in the original alignment) and 1575 bp of 28S rRNA (88% of 1785 bp in the original alignment).

The best nucleotide substitution models were determined using jModelTest (v.X; Darriba *et al.* 2012) using the Akaike information criterion (AIC). The best nucleotide substitution models were for cytB HKY+I+G and for all three rRNA genes GTR+I+G. These models were used in Bayesian phylogenies implemented in MrBayes (v.3.2.6; Huelsenbeck & Ronquist, 2001). The analysis ran for 10 000 000 generations, with a sample frequency of 1000. The first 10% were discarded as burn-in after checking that runs had reached stationarity. Stationarity was determined by examining traces in TRACER (v.1.6 <http://tree.bio.ed.ac.uk/software/tracer/>). Convergence between the two runs was tested by examining traces using TRACER and by checking that the potential scale reduction factors produced by the 'sump' command in MrBayes were close to one (Gelman & Rubin, 1992) and that the mean standard deviation of split frequencies approached zero.

#### TAXONOMIC RATIONALE

Because the species taxonomy of *Laternula* is so confused, care was taken to identify the taxa included in the molecular analyses. Type material of *Laternula* species was examined in NHMUK and MNHN along with images of other relevant specimens from ANSP, NHMD, MHNG and WAM. Using these, plus the taxonomic revisions of Reeve (1860), Lamy (1934) and most recently Huber (2010) and figures in regional faunas (e.g. Lamprell & Healy, 1998; Okutani, 2000; Lutaenko & Noseworthy, 2012) augmented by the results of our molecular analysis herein, we have derived an outline taxonomic classification (Appendix) listing what we believe are extant species and their synonyms. Notable taxonomic changes resulting from study of type material (NHMD) are that *Solen spengleri* Gmelin, 1792 (herein *Exolaternula spengleri* Fig. 1D) is an earlier name for the species variously called *L. anserifera* (Spengler, 1793), *L. truncata* (Lamarck, 1818 auct.) or *L. rostrata* (Sowerby, 1839). Images of newly separated valves of the holotype of *Anatina liautaudi* Mitre, 1844 (MNHN IM-2000-33234) indicate that it is the earliest name (herein as *Exolaternula liautaudi*) for the variously named north-east Asian margin species. Also, genetic data (herein) show that the Australian species variously identified as *Laternula gracilis*, *L. marilina* and *L. recta* are a single species, with *L. gracilis* (Reeve, 1860) having priority. Our present estimate is that there are 15 living species of Laternulidae; further and more comprehensive sampling will probably resolve some problem areas but may also reveal the existence of cryptic species.

**Institutional abbreviations:** ANSP, Academy of Natural Sciences Philadelphia at Drexel University, USA; BAS, British Antarctic Survey, Cambridge, UK; MAGNT, Museum and Gallery of Northern Territory, Australia; MHNG, Muséum d'histoire naturelle, Geneva, Switzerland; MNHN, Muséum national d'Histoire naturelle, Paris, France; NHMD, Natural History Museum of Denmark, Copenhagen; NHMUK, The Natural History Museum, London, UK; WAM, Western Australian Museum, Perth, WA.

## RESULTS

All individual gene trees had similar topologies to each other and to the combined gene tree shown in Figure 2. A clear result is that the sequenced Laternulidae species split into two major groups, one comprising

*L. spengleri* from Singapore and Philippines and *L. liautaudi* from Japan and south-eastern Russia and a second, larger group containing all the other species including *L. elliptica*.

A robust topology in all gene trees is that, in the larger clade, *Laternula elliptica* is the sister group, with maximum support ( $P = 1.0$ ), to all the other *Laternula* species from Australia, south-eastern Asia and southern Japan. Amongst the temperate and tropical samples are three well-supported sub-clades. One consists of three *Laternula* collected from near Esperance (southern Western Australia), Papua New Guinea and southern Japan; these are similar to *Laternula anatina* in shell form but are genetically different from each other and we have identified them as *L. creccina*, *L. anatina* and *L. japonica*. The cooler water *Laternula creccina* is the sister group to the two warm water species. A second sub-clade includes three

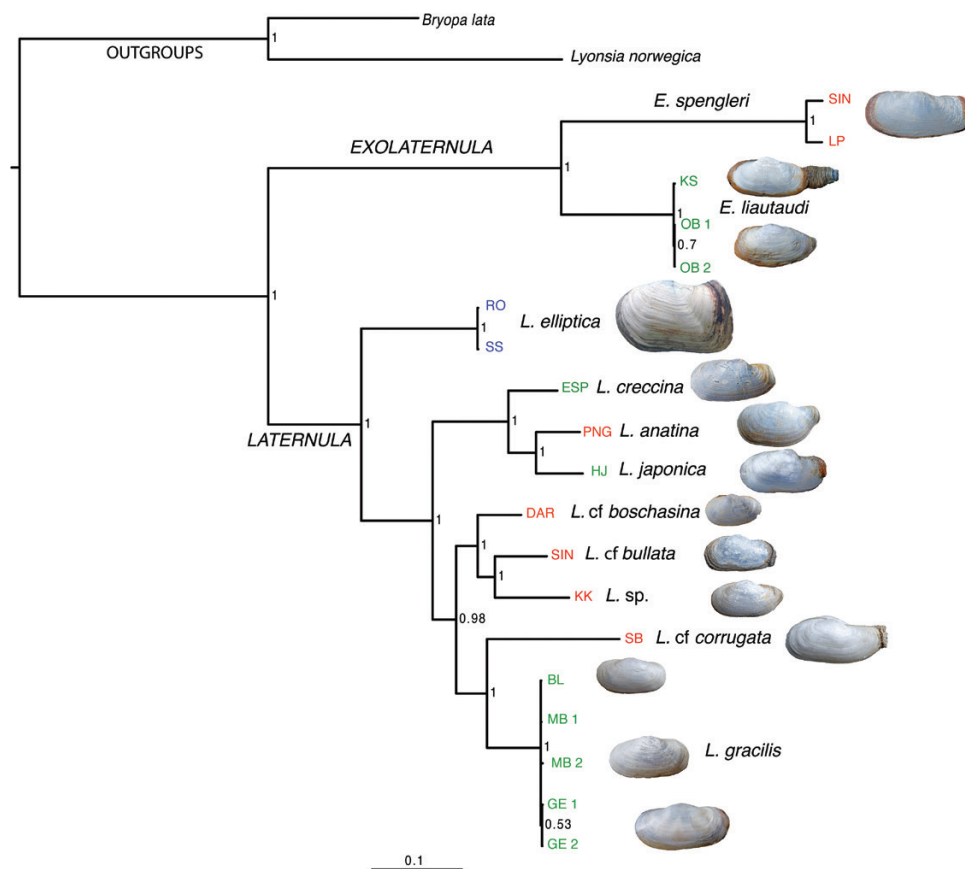

**Figure 2.** Combined gene tree for Laternulidae based on sequences from four genes (28S rRNA, 12S, 16S and cyt b) using Bayesian inference as implemented by MrBayes. Support values are posterior probabilities (PP). Images are of sequenced specimens or proxies – not to scale. Colour code on localities denotes: tropical (red), temperate (green) and Antarctic (blue) Locality codes used on the tree: BL – Burrill Lake, New South Wales, Australia; DAR – Darwin, Australia; ESP – Esperance, Western Australia; HJ – Higata-Jima Island, Japan; GE – Geelong, Victoria, Australia; KK – Kungkraben Bay, Thailand; KS – Kojima-Shinden, Japan; LP – Luzon, Philippines; MB – Moreton Bay, Queensland, Australia; OB – Olga Bay, eastern Russia; PNG – Papua New Guinea; RO – Rothera, Adelaide Island, Antarctica; SB – Shark Bay, Western Australia; SIN – Singapore; SS – South Shetland Islands.

samples collected at Darwin, Singapore and eastern Thailand but differ from each other in the molecular tree. The sample from Darwin is closest in shell characters to *L. boschasina*. The specimen from Singapore resembles the syntypes of *L. bullata* and differs from the Kungkraben Bay, Thailand, example which we retain as *Laternula* sp. The third sub-clade comprises *Laternula* from southern and eastern Australia [Port Phillip Bay (Victoria), Burrill Lake (New South Wales) and Moreton Bay (Queensland)]. *Laternula* from these locations have been variously named in collections as *L. gracilis*, *L. recta* and *L. marilina* but these have only minor genetic differences, suggesting that they are conspecific, with *L. gracilis* having taxonomic priority. A species from Shark Bay, Western Australia, that we identify as *L. cf. corrugata*, is a sister to the eastern Australian *Laternula gracilis*.

#### GEOLOGICAL RECORD OF *Laternula*

Other anomalodesmatans possessing an umbonal slit (Periplomatidae) have been confused with *Laternula*, especially in fossils, and many records of fossil *Laternula* can be discounted. For example, the so-called *Laternula fuchsi* (Hoernes, 1875) widely reported from the Miocene (Burdigalian) of eastern Europe (Harzhauser, Mandic & Schlögl, 2011) is a periplomatid, as is *Laternula ravni* Schnetler, 2001 from the Palaeocene of Denmark. Furthermore, the ‘*Laternula*’ species widely reported from the Cenozoic of far Eastern Russia are now classified as Periplomatidae (Kafanov, Ogasawara & Marincovich, 2001).

A search of the fossil literature for records of bivalves that resemble our concept of *Laternula* indicates that they are rare. This may be a consequence of the poor preservation potential of the thin, fragile, aragonitic shells and also the association with mangrove and organic-rich sediments from estuarine settings. *Anatina burdigalensis* Cossmann & Peyrot, 1909 (122-3 pl. LXIII fig. 34) from the Miocene (Serravallian 13.82–11.63 Mya) of the Aquitaine Basin, France, resembles the living *Exolaternula spengleri* in shape (Fig. 1G). Fossils resembling the living *Exolaternula liautaudi* have been recorded as *L. limicola* from the mid-Miocene of central Japan (Itoigawa *et al.*, 1981, 1982). Crame (1984) reported *Laternula* spp. from late Neogene (Pliocene?) deposits of the Makran coast, Pakistan, and these samples (in NHMUK) have shapes resembling living *L. anatina*. An earlier fossil from the Eocene Rio Turbio Formation of Patagonia [mid-Lutetian to mid-Priabonian, 44.6–34 Mya, date from González Estebenet *et al.* (2014)], described and figured as *Laternula* sp. by Griffin (1991: fig. 10 1-2), is broadly similar to *L. spengleri* in shape (Fig. 1H, I). A possible Late Cretaceous (Campanian/Maastrichtian)

*Laternula* sp. has been described from Argentina (Parras & Griffin, 2013); this is more equivocal in attribution but has an umbonal slit and buttress. Further back in time some Mesozoic genera have been assigned to the Laternulidae, namely *Anatimya*, *Cercomya*, *Plectomya* and *Platymyoidea* (Keen & Cox, 1969) but these appear morphologically distant from living *Laternula*.

#### HISTORY OF *Laternula* IN ANTARCTICA

Careful re-examination of both reference collections and the literature indicates that there are no *bona fide* Early Cenozoic representatives of *Laternula* from the extensive Early Cenozoic fossil record of Antarctica. The Oligocene–Miocene interval is much less complete (Beu, 2009; Beu & Taviani, 2014). The earliest unequivocal record of the genus is that known from the Cockburn Island Formation, which forms part of a complex sequence of glacial and interglacial sediments interbedded with the late Neogene James Ross Island Volcanic Group (JRIVG), north-eastern Antarctic Peninsula (Smellie, Johnson & Nelson, 2013; Beu & Taviani, 2014). Specimens from the type area of the formation, Cockburn Island (64°12'S, 56°50'W), were assigned to *Laternula elliptica* by both Soot-Ryen (1952) and Jonkers (1998a), with the only difference being that their maximum size (150 mm+ in length) somewhat exceeded those of the modern form (Fig. 1F). However, in all other respects they are very close to living *L. elliptica* and we see no need to assign them to a separate taxon. Co-occurring specimens of the large pectinid *Austrochlamys anderssoni* (Hennig) have been reliably dated at 4.7 Mya by <sup>87</sup>Sr/<sup>86</sup>Sr isotopes, and this age agrees well with that of 4.7–4.9 Mya for underlying basaltic lavas of the JRIVG (<sup>40</sup>Ar/<sup>39</sup>Ar dating) (Smellie *et al.*, 2013). The 4.7 Mya age (i.e. earliest Pliocene) for the specimens of *L. elliptica* from Cockburn Island represents the earliest definitive fossil record of the genus from Antarctica. Within the James Ross Island group there are sparse records of *Laternula* from younger glacial/interglacial sediments interbedded with the JRIVG (i.e. the Hobbs Glacier Formation and its lateral equivalents). For example, *Laternula* sp. is noted from the southern end of Sykes Cliffs on the western side of Croft Bay (64°01'S, 57°49'W) (Jonkers, 1998b), and a poorly constrained <sup>40</sup>Ar/<sup>39</sup>Ar age from overlying lavas was resolved to be 2.38 Mya (Smellie *et al.*, 2013). A potentially older Antarctic specimen of *Laternula* has been recovered from the Battye Glacier Formation, Prince Charles Mountains, East Antarctica (70°48'S, 68°20'E). Although it clearly possesses a buttressed chondrophore and nacreous inner shell layer, it is very incomplete and can only doubtfully be referred to *Laternula*? sp. (Stilwell, Harwood & Whitehead, 2002: fig. 2m, n). The suggested Middle–Late Miocene



age range for the Battye Glacier Formation is based on the associated diatom assemblage. Better preserved material is available from the Sørsdal Formation, Marine Plain, Vestfold Hills, East Antarctica (68°38'S, 78°8'E), and this has been identified as *L. elliptica* (Quilty *et al.*, 2016). The Sørsdal Formation is dated by diatoms as Early Pliocene, 4.2–4.1 Mya (Quilty *et al.*, 2016). There is an Early Pleistocene (Galasian) record of *L. elliptica* from the Scallop Hill Formation of McMurdo Sound (78°11'S, 166°58'E) (Speden, 1962; Beu & Taviani, 2014), and widespread evidence for a Late Quaternary to Holocene circum-Antarctic distribution of the species (Pickard, 1985).

## DISCUSSION

The results show clearly that there are two distinct phylogenetic groups of *Laternula* species: the clade comprising *L. spengleri* and *L. liautaudi* with both species possessing a lithodesma, and the larger clade of all the other species where it is lacking in the adult. A lithodesma is present in the majority of anomalodesmatan families including Pandoridae, Lyonsiidae and Clavagellidae, the sister clades to *Laternula* (Harper, Hide & Morton, 2000; Harper *et al.*, 2006). Thus, its presence in some species is interpreted as a retained plesiomorphic character and its absence in the larger clade as an apomorphic state. Contrary to Savazzi (1990: 100), only three species of *Laternula* are known to possess a lithodesma in adult shells: *L. spengleri*, *L. liautaudi* and *L. erythraea* (the last not molecularly sampled). *Laternula spengleri* and *L. liautaudi* form a robust clade that supports their classification in a distinct genus, *Exolaternula*, although other shell characters appear similar to *Laternula* species. Significantly, Sartori (2009) reported and illustrated lithodesmas in juvenile *L. elliptica* with shell lengths less than c. 12 mm but these become resorbed in larger shells. This ontogenetic loss of a lithodesma has also been reported in some Thraciidae species (Sartori & Ball, 2009).

The three known *Exolaternula* species are distributed today (Fig. 3) along the northern Indian Ocean and Arabian Gulf (*E. erythraea*), through south-east Asia (*E. spengleri*), China, Korea and Japan as far north as Peter the Great Bay, Russia (*E. liautaudi*). *Exolaternula liautaudi* also occurs as an exotic on the west coast of the USA (Miller *et al.*, 1999). The distribution of *E. spengleri* touches the very north of Australia, with a single 19<sup>th</sup> century (NHMUK) record from Port Essington, Northern Territory. The distribution given in Lamprell & Healy (1998) of this species (as *L. rostrata*) around southern Australia and New South Wales and followed in some ecological studies is erroneous and based on misidentifications.

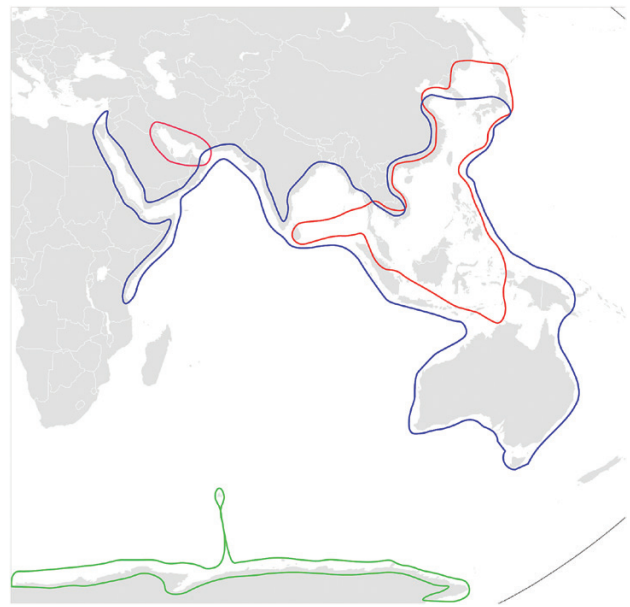

**Figure 3.** Distributional ranges of *Exolaternula* and *Laternula* species in the Indo-West Pacific and Southern Oceans. Robinson projection. Red – *Exolaternula*, blue – *Laternula*, green – *Laternula elliptica*.

It seems likely that *Exolaternula* split from the other *Laternula* in the early Cenozoic with the clade having a different biogeographical history. We suggest that the present distribution of *Exolaternula*, restricted to the northern Indian Ocean and southern and eastern margins of Asia, reflects a Tethyan origin. The Miocene *Anatina burdigalensis* from southern France resembles *E. spengleri* in shell form and we consider it as a species of *Exolaternula*, the last survivor in western Tethys before the early Miocene closure of the Tethyan Seaway (Harzhauser *et al.*, 2007). Fossils resembling the living *Exolaternula liautaudi* were present in Japan at least by the mid-Miocene (Itoigawa *et al.*, 1981, 1982).

In the *Laternula* clade the sister position of *Laternula elliptica* relative to all other species suggests a separation before the diversification of the temperate and tropical species. This is consistent with the scenario that *L. elliptica* or its precursor was left isolated around Antarctica after the separation and northward movement of Australia with the opening of the Tasman Gateway and onset of the Antarctic Circumpolar Current c. 30 Mya in the early Oligocene (Scher *et al.*, 2015). This final breakup of the Gondwanan–Weddellian Province (Zinsmeister, 1979) would have disrupted larval interchange as Australia progressively moved northwards. Subsequently, as Australia moved into lower latitudes, warmer water species such as *L. anatina* may have spread into south-east Asia and the northern Indian Ocean while Australia retained a diversity of temperate water endemic species such as *L. gracilis*, *L. creccina* and *L.*

*tasmanica*, or their precursors. The scenario that *L. elliptica* originated from a southward migration as a more derived taxon (OTT hypothesis; Jablonski *et al.*, 2006, 2013) during a period of polar amelioration can be rejected.

A single record from the Pliocene of New Zealand of a fragmentary fossil, *Laternula synthetica* Marwick, 1948, with an estimated shell length of 120 mm (later renamed *L. laterna* Lamarck, 1818 by Beu, 2004) was interpreted to have arrived during a warm period. However, the long pallial sinus of this fossil precludes identification as *L. laterna* (a tropical species), which has a short sinus, and it most closely resembles the south-eastern Australian species, *L. gracilis* and *L. tasmanica*.

Although it would be desirable to include more samples in the analysis, our results are consistent with an Australian origin for the tropical *Laternula*. For example, *Laternula creccina* from temperate southern Australia is a sister species to tropical *L. anatina* from Papua New Guinea and sub-tropical *L. japonica* from Japan. Similarly, *L. cf. boschasina* from Darwin, northern Australia, is a sister species to two tropical species from Singapore and Thailand. Moreover, the diversity of *Laternula* species around Australia and their wide latitudinal spread compared with other Indo-West Pacific areas is also evidence supporting this idea.

Of the *Laternula* species, *L. anatina* (Fig. 1E) has the broadest distribution, recorded from Kenya, the Red Sea, the northern Indian Ocean, through south-eastern Asia, northern Australia to Philippines, China and southern Japan. It is also present as a Lessepsian invader into the eastern Mediterranean (Gofas & Zenetos, 2003). Nonetheless, our preliminary molecular results suggest that cryptic species may exist; for example, the frequently synonymized *L. japonica* is genetically distinct from *L. anatina*. Other species at lower latitudes have narrower ranges, *L. navicula* in the northern Indian Ocean, *L. boschasina* in south-east Asia and *L. laterna* around northern Australia.

Our phylogenetic evidence supports the idea that *Laternula elliptica* or its precursor was isolated around Antarctica following the split and northward movement of the Australian continent with the opening of the Tasman Gateway and initiation of the Circum-Antarctic Current. Following separation and onset of cooling conditions the species became adapted physiologically to lower temperatures (Peck *et al.*, 2009). *Laternula elliptica* differs morphologically from congeners in its much larger size, very wide posterior gape, thicker shell (Watson *et al.*, 2012) and prominent periostracum. It also lacks the exterior shell spikes characteristic of all other *Laternula* species and many other anomalodesmatans (Checa &

Harper, 2010). *Laternula elliptica* is abundant in shallow water around Antarctica particularly at depths of 10–30 m and even intertidally (Waller *et al.*, 2017), with population densities reported up to 65/m<sup>2</sup> (Dell, 1990; Zamorano, Duarte & Moreno, 1986). The general lack of durophagous predators (decapod crustaceans and fish) in Antarctic seas (Clarke *et al.*, 2004) could be a contributory factor in its success. By comparison, the lower latitude species of *Laternula* tend to occupy peripheral marine habitats where predation pressure is probably reduced, such as mangrove fringes (Morton, 1973; Prezant *et al.*, 2008), estuaries with fluctuating salinities (Kang *et al.*, 2006; Kanaya *et al.*, 2008), or locations with elevated salinities such as Shark Bay, Western Australia (Logan & Cebulski, 1970) or the Arabian Gulf (Sheppard *et al.*, 2010).

Corroboration of the biogeographical scenarios with a fossil record would be desirable but as already noted the fossil record of *Laternula* is poor. The only Southern Hemisphere Early Cenozoic occurrence, *Laternula* sp. from the Eocene Rio Turbio Formation, Santa Cruz Province, Argentina, is part of a still imperfectly known molluscan fauna that does show at least some resemblance to that known from the La Meseta Formation of Seymour Island, north-eastern Antarctic Peninsula (Griffin, 1991). Palaeogeographical reconstructions for the Eocene connection between Tierra del Fuego and the northern tip of the Antarctic Peninsula are complex, but some of the most recent ones, based on new marine geophysical data, place the Rio Turbio basin at a significantly higher palaeolatitude than its present-day position of 51°30'S (Maldonado *et al.*, 2014: fig. 8). It would certainly have been well within Zinsmeister's (1979, 1982, 1984) Weddellian Province, and *Laternula* sp. may represent part of the ancestral lineage of *L. elliptica*. The Rio Turbio Formation does appear to contain a series of distinct sedimentary facies that are missing in the La Meseta Formation, and the two units almost certainly represent slightly different types of shallow marine environment (Griffin, 1991).

As a result of recent taxonomic and stratigraphic studies it has been determined that approximately one-third of the 147 gastropod and bivalve species known from the Middle Eocene section of the La Meseta Formation can now be assigned to modern genera (Beu, 2009; Crame *et al.*, 2014). This means that, for at least one key part of the modern Antarctic marine fauna, it was beginning to take shape some 10–15 Mya before the onset of significant global cooling at the Eocene–Oligocene boundary (Zachos, Dickens & Zeebe, 2008). Molecular phylogenetic evidence suggests that the amphipod genus *Epimeria*, which today forms a species flock in the Southern Ocean, diversified initially in the Middle or Late Eocene (Verheye, Backeljau & d'Udekem d'Acoz, 2017), and the split between the Antarctic/sub-antarctic limpet *Nacella* and its temperate to tropical

sister taxon *Cellana* occurred at 32 Mya (González-Wevar *et al.*, 2017). There is even a combination of molecular phylogenetic and biogeographical evidence from the Antarctic terrestrial realm to suggest that a range of taxa had similar Early Cenozoic roots, and have survived to the present day using various types of refugia (Convey *et al.*, 2008). All of this evidence suggests that the Antarctic biota is of considerable ancestry and has been able to adapt to progressive global cooling over a period of tens of millions of years. *Laternula* had Eocene or even earlier roots in the Antarctic region and was then able to adapt to both the cooling of Antarctica and the warming of the Australian continent as it moved progressively northwards.

Despite the present-day diversity and abundance of *Laternula* species around Australia, the fossil record from there is lacking, with no mention of the genus in Darragh's (1985) analysis of the Cenozoic molluscan faunas of south-eastern Australia. However, the stratigraphic record is very patchy and suitable facies are not preserved. Coupled with the preferred marginal marine habitats and fragile shells, this may account for the lack of *Laternula* fossils. However, Pufahl *et al.* (2004) report *Laternula* sp. from Pliocene estuarine deposits in the Murray Basin, South Australia. The fossils are preserved as casts and moulds with aragonitic shells dissolved away and identifications were made in the field (N. James, personal communication). If confirmed, these are the only *Laternula* fossils recorded from Australia.

In summary, our molecular results revealed two distinct groups of living Laternulidae. One comprises *Exolaternula* species possessing a lithodesma and a distribution largely around the northern Indian Ocean and the southern margin of the Asian continent. The *Exolaternula* clade probably had a Tethyan origin with connections to the western Tethys in the early Miocene but later severed by the closure of the Tethyan Seaway. The more numerous *Laternula* species lack a lithodesma in the adult, with the Antarctic *L. elliptica* as a sister taxon to all other species from Australia and central Indo-West Pacific. The *Laternula* clade probably originated on the Late Gondwanan southern Australia/Antarctica continent, leaving *L. elliptica* isolated around Antarctica after Australia split and drifted northwards with opening of the Southern Ocean. Temperate and tropical species exist around Australia but we suggest that the tropical species spread and diversified into coastal Asia from the mid-Miocene onwards after the closer approach of Australia.

#### ACKNOWLEDGEMENTS

For generously providing samples we are grateful to Ruytoro Goto (University of Kyoto), Barbara Buge

(MNHN), Konstatin Lutaenko (Russian Academy of Sciences, Vladivostok), Koh Siang Tan (National University of Singapore), Piotr Kuklinski (Institute of Oceanology, Polish Academy of Sciences) and Simon Morley (BAS). Dawn Woods, George Mulvaney and Michael Mulvaney helped collect samples at Burrill Lake, New South Wales. Grateful thanks are due to Tom Schiotte (NHMD) for images of the *Mya anserifera* holotype, Emmanuel Tardy (MHNG) for images of the lectotype of *Anatina laterna*, Virginie Héros (MNHN) for arranging opening of valves and images of the holotype of *Laternula liautaudi*, Konstantin Lutaenko and Elena Chaban (Zoological Museum, St Petersburg) for searching for the type of *L. japonica*, and Lisa Kirkendale (WAM) and Richard Willan (MAGNT) for images of shells in their collections. David Cothran generously allowed reproduction of his images of living *L. elliptica*. Tom Darragh (Museum Victoria) advised on Australian fossil faunas, Pierre Lozouet (MNHN) confirmed dating of fossils and Takuma Haga (NMNS, Tokyo) provided information and literature concerning Japanese living and fossil species. We thank Lisa Smith (NHMUK) for help with molecular analyses and Adrian Glover (NHMUK) who facilitated the process. JAC acknowledges financial support from NERC, including NE/I00582X/1. The work of the late Solene Morris former curator of bivalves at NHMUK is acknowledged for careful curation of the *Laternula* type specimens. We thank Alan Beu and another reviewer for thoughtful comments and suggestions.

#### REFERENCES

- Adal MN, Morton B. 1973. The fine structure of the pallial eyes of *Laternula truncata* (Bivalvia: Anomalodesmata: Pandoracea). *Journal of Zoology* **170**: 533–556.
- Ahn IY, Lee SH, Kim KT, Shim JE, Kim DY. 1996. Baseline heavy metal concentrations in the Antarctic clam, *Laternula elliptica* in Maxwell Bay, King George Island, Antarctica. *Marine Pollution Bulletin* **32**: 592–598.
- Altschul SF, Gish W, Miller W, Myers EW, Lipman DJ. 1990. Basic local alignment search tool. *Journal of Molecular Biology* **215**: 403–410.
- Beu AG. 2004. Marine Mollusca of oxygen isotope stages of the last 2 million years in New Zealand. Part 1: Revised generic positions and recognition of warm-water and cool-water migrants. *Journal of the Royal Society of New Zealand* **34**: 111–260.
- Beu AG. 2009. Before the ice: biogeography of Antarctic Paleogene molluscan faunas. *Palaeogeography, Palaeoclimatology, Palaeoecology* **284**: 191–226.
- Beu AG, Taviani M. 2014. Early Miocene mollusca from McMurdo Sound, Antarctica (ANDRILL 2A drill core), with a review of Antarctic Oligocene and Neogene Pectinidae (Bivalvia). *Palaeontology* **57**: 299–342.



- Brey T, Voigt M, Jenkins K, Ahn I-Y. 2011.** The bivalve *Laternula elliptica* at King George Island — a biological recorder of climate forcing in the West Antarctic Peninsula region. *Journal of Marine Systems* **88**: 542–552.
- Castresana J. 2000.** Selection of conserved blocks from multiple alignments for their use in phylogenetic analysis. *Molecular Biology and Evolution* **17**: 540–552.
- Checa AG, Harper EM. 2010.** Spikey bivalves: intraperiostacral crystal growth in anomalodesmatans. *Biological Bulletin* **219**: 231–248.
- Chemnitz JH. 1782.** *Neues systematisches Conchylien-Cabinet*, Vol. 6, 1–375, pls1–36. Nürnberg: Raspe.
- Clark MS, Thorne MAS, Viera FA, Cardoso JCR, Power DM, Peck LS. 2010.** Insights into shell deposition in the Antarctic bivalve *Laternula elliptica*: gene discovery in the mantle transcriptome using 454 pyrosequencing. *BMC Genomics* **11**: 362.
- Clarke A, Aronson RB, Crame JA, Gili J-M, Blake DB. 2004.** Evolution and diversity of the benthic fauna of the Southern Ocean continental shelf. *Antarctic Science* **16**: 559–568.
- Clarke A, Crame JA. 1989.** The origin of the Southern Ocean marine fauna. In: Crame, JA, ed. *Origins and evolution of the Antarctic biota*. Geological Society London, *Special Publications* **47**: 253–268.
- Coan EV, Petit RE, Zelaya DG. 2011.** Authorship and date of a key South American paper by Phillip P. King (1832). *The Nautilus* **125**: 86–88.
- Combosch DJ, Collins TM, Glover EA, Graf DL, Harper EM, Healy JM, Kawauchi GY, Lemer L, McIntyre E, Strong EE, Taylor JD, Zardus JD, Mikkelsen PM, Giribet G, Bieler R. 2017.** A family-level Tree of Life for bivalves based on a Sanger-sequencing approach. *Molecular Phylogenetics and Evolution* **107**: 191–208.
- Convey P, Gibson JAE, Hillenbrand C.D, Hodgson DA, Pugh PJA, Smellie JL, Stevens MI. 2008.** Antarctic terrestrial life – challenging the history of the frozen continent? *Biological Reviews* **83**: 103–117.
- Cossmann M, Peyrot A. 1909.** Conchologie néogénique de L'Aquitaine. *Actes de la Société Linnéenne de Bordeaux* **63**: 73–144.
- Crame JA. 1984.** Neogene and quaternary mollusca from the Makran coast, Pakistan. In: Haq BU, Milliman JD eds. *Marine geology and oceanography of Arabian Sea and coastal Pakistan*. New York: Van Nostrand Reinhold, 45–61.
- Crame JA, Beu AG, Ineson JR, Francis JE, Whittle RJ, Bowman VC. 2014.** The Early origin of the Antarctic marine fauna and its evolutionary implications. *PLoS ONE* **9**: e114743.
- Cuvier G. 1829–1830.** Le Règne Animal distribué d'après son organisation, pour servir de base à l'histoire naturelle des animaux et d'introduction à l'anatomie comparée (2nd edition, 5 volumes, molluscs in volume 2, 1829). Paris: Déterville.
- Darragh TA. 1985.** Molluscan biogeography and biostratigraphy of the Tertiary of southeastern Australia. *Alcheringa* **9**: 83–116.
- Darriba D, Taboada GL, Doallo R, Posada D. 2012.** jModelTest 2: more models, new heuristics and parallel computing. *Nature Methods* **9**: 772–772.
- Dell RK. 1990.** Antarctic Mollusca with special reference to the fauna of the Ross Sea. *Bulletin of the Royal Society of New Zealand* **27**: 1–311.
- Feulner GR, Hornby RJ. 2006.** Intertidal molluscs in UAE lagoons. *Tribulus* **16**: 17–23.
- Fofonoff PW, Ruiz GM, Steves B, Simkanin C, Carlton JT. 2017.** *National Exotic Marine and Estuarine Species Information System*. Available at: <http://invasions.si.edu/nemesis/> (accessed 31 July 2017).
- Gelman A, Rubin DB. 1992.** Inference from iterative simulation using multiple sequences (with discussion). *Statistical Science* **7**: 457–511.
- Gmelin JF. 1792.** *Caroli a Linné systema naturae per regna tria naturae, 13th edition volume 1, part 6 Vermes*, pp. 3021–3910.
- Gofas S, Zenetos A. 2003.** Exotic molluscs in the Mediterranean Basin: current status and perspectives. *Oceanography and Marine Biology* **41**, 237–277.
- González PM, Puntarulo S. 2011.** Iron and nitrosative metabolism in the Antarctic mollusc *Laternula elliptica*. *Comparative Biochemistry and Physiology, Part C* **153**: 243–250.
- González Estebenet MS, Guerstein GR, Rodríguez Raising ME. 2014.** Middle Eocene dinoflagellate cysts from Santa Cruz Province, Argentina: biostratigraphy and paleoenvironment. *Review of Palaeobotany and Palynology* **211**: 55–65.
- González-Wevar CA, Hüne M, Segovia NI, Nakano T, Spencer HG, Chown SL, Saucède T, Johnstone G, Mansilla A, Poulin E. 2017.** Following the Antarctic Circumpolar Current: patterns and processes in the biogeography of the limpet *Nacella* (Mollusca: Patellogastropoda) across the Southern Ocean. *Journal of Biogeography* **44**: 861–874.
- Grabau AW, King SG. 1928.** *Shells of Petaiho. Handbook No. 2*. Beijing: Peking Society of Natural History.
- Griffin M. 1991.** Eocene bivalves from the Rio Turbio formation, southwestern Patagonia (Argentina), *Journal of Paleontology* **65**: 119–146.
- Habe T. 1952.** Astartidae, Crassatellidae, Mesodesmatidae and Laternulidae in Japan. In: Kuroda T, ed. *Illustrated Catalogue of Japanese Shells* **22**: 161–172.
- Habe T. 1977.** *Systematics of Mollusca in Japan. Bivalvia and Scaphopoda*. Tokyo: Hokuryan.
- Harper EM, Clark MS, Hoffman JI, Philipp EER, Peck LS, Morley SA. 2012.** Iceberg scour and shell damage in the Antarctic bivalve *Laternula elliptica*. *PLoS ONE* **7**: e46341.
- Harper EM, Dreyer H, Steiner G. 2006.** Reconstructing the Anomalodesmata (Mollusca: Bivalvia): morphology and molecules. *Zoological Journal of the Linnean Society* **148**: 395–420.
- Harper EM, Hide EA, Morton B. 2000.** Relationships between the extant Anomalodesmata: a cladistic test. In: Harper EM, Taylor JD, Crame JA, eds *The evolutionary biology of the Bivalvia*. Geological Society of London *Special Publications* **77**: 129–143.
- Harzhauser M, Kroh A, Mandic O, Piller WE, Gohlich U, Resuter M, Berning B. 2007.** Biogeographic responses



- to geodynamics: a key study all around the Oligo-Miocene Tethyan Seaway, *Zoologischer Anzeiger* **246**: 241–256.
- Harzhauser M, Mandic O, Schlögl J. 2011.** A late Burdigalian bathyal mollusc fauna from the Vienna Basin (Slovakia). *Geologica Carpathica* **62**: 211–231.
- Huelsenbeck JP, Ronquist F. 2001.** MRBAYES: Bayesian inference of phylogenetic trees. *Bioinformatics* **17**: 754–755.
- Hoernes R. 1875.** Die Fauna des Schliers von Ottnang. *Jahrbuch der Kaiserlichen Königlichen Geologischen Reichsanstalt* **25**: 333–400.
- Huber M. 2010.** *Compendium of bivalves. A full-color guide to 3,300 of the World's marine bivalves; a status on Bivalvia after 250 years of research.* Hackenheim: ConchBooks.
- Itoigawa J, Shibata H, Nishima H, Okumura Y. 1981.** Miocene fossils of the Mizunami group central Japan. 2. Molluscs. *Monograph of the Mizunami Fossil Museum* **3A**: 1–53 (in Japanese).
- Itoigawa J, Shibata H, Nishima H, Okumura Y. 1982.** Miocene fossils of the Mizunami group, central Japan. 2. Molluscs (continued). *Monograph of the Mizunami Fossil Museum* **3B**: 1–330 (in Japanese).
- Jablonski D, Belanger CL, Berke SK, Huang S, Krug AZ, Roy K, Tomasovych A, Valentine JW. 2013.** Out of the tropics, but how? Fossils, bridge species, and thermal ranges in the dynamics of the marine latitudinal diversity gradient. *Proceedings of the National Academy of Sciences of the USA* **110**: 10487–10494.
- Jablonski D, Roy K, Valentine JW. 2006.** Out of the tropics: evolutionary dynamics of the latitudinal diversity gradient. *Science* **314**: 102–106.
- Jonkers HA. 1998a.** The Cockburn Island Formation; Late Pliocene interglacial sedimentation in the James Ross Basin, northern Antarctic Peninsula. *Newsletters in Stratigraphy* **36**: 63–76.
- Jonkers HA. 1998b.** Stratigraphy of Antarctic late Cenozoic pectinid-bearing deposits. *Antarctic Science* **10**: 161–170.
- Kafanov AI, Ogasawara K, Marincovich L. 2001.** Checklist and bibliography of the Cenozoic marine Bivalvia (Mollusca) of Northeastern Asia (Russian Far East), 1968–1999. *Bulletin of the Mizunami Fossil Museum* **28**: 1–138.
- Kanaya G, Takagi S, Kikuchi E. 2008.** Spatial dietary variations in *Laternula marilina* (Bivalvia) and *Hediste* spp. (Polychaeta) along environmental gradients in two brackish lagoons. *Marine Ecology Progress Series* **359**: 133–144.
- Kang CK, Lee YW, Choy EJ, Shin JK, Seo IS, Hong JS. 2006.** Microphytobenthos seasonality determines growth and reproduction in intertidal bivalves. *Marine Ecology Progress Series* **315**: 113–127.
- Kang DH, Ahn IY, Choi KS. 2003.** Quantitative assessment of reproductive condition of the Antarctic clam, *Laternula elliptica* (King & Broderip), using image analysis. *Invertebrate Reproduction & Development* **44**: 71–78.
- Keen M, Cox LR. 1969.** Family Laternulidae. In: Moore RC, ed. *Treatise on Invertebrate Paleontology, Part N, Mollusca 6, Bivalvia, (2)*. Boulder: Geological Society of America and Lawrence: University of Kansas Press, N491–N518.
- King PP. 1832.** Description of Cirrhipeda, Conchifera and Mollusca, in a collection formed by the officers of HMS Adventure and Beagle employed between the years 1826 and 1830 in surveying the southern coasts of South America, including the Straits of Magalhaens and the coast of Tierra del Fuego [“assisted by W. J. Broderip”]. *Zoological Journal* **5**: 332–349.
- Lai CH, Morley SA, Tan KS, Peck LS. 2011.** Thermal niche separation in two sympatric tropical intertidal *Laternula* (Bivalvia: Anomalodesmata). *Journal of Experimental Marine Biology and Ecology* **405**: 68–72.
- Lamarck JBPA de 1818.** *Histoire naturelle des Animaux sans vertèbres* 5. Paris: Verdière, Deterville et chez d’auteur.
- Lamprell K, Healy J. 1998.** *Bivalves of Australia. vol. 2.* Leiden: Backhuys Publishers.
- Lamy E. 1934.** Revision des *Anatina* vivants du Museum National d’Histoire Naturelle de Paris. *Journal de Conchyliologie* **78**: 145–168.
- Linnaeus C. 1758.** *Systema Naturae per Regna Tria Naturae, Secundum Classes, Ordines, genera, Species, cum Characteribus, Differentiis, Synonymis, Locis. Tomus 1, 10th edn.* Stockholm: L. Salvii.
- Lipps JH, Hickman CS. 1982.** Origin, age, and evolution of Antarctic and deep-sea faunas. In: Ernst WG, Morin JG (eds) *The environment of the deep sea. Rubey Volume II.* Englewood Cliffs: Prentice-Hall Inc., 325–356.
- Lischke CE, 1872.** Diagnosen neuer Meeres-Conchylien von Japan. *Malakozoologisches Blätter* **19**: 100–109.
- Lischke CE, 1874.** *Japanische Meeres-Conchylien. Ein Beitrag zur Kenntnis der Mollusken Japans, mit besonderer Rücksicht auf die Geographische Verbreitung derselben.* Vol. 3: 1–123, pls 1–9. Cassel: Theodor Fischer.
- Logan BW, Cebulski DE. 1970.** Sedimentary environments of Shark Bay, Western Australia. *American Association of Petroleum Geologists Memoir* **13**: 1–37.
- Lutaenko KA, Noseworthy RG. 2012.** *Catalogue of the living Bivalvia of the continental coast of the Sea of Japan (East Sea).* Vladivostok: Dalnauka.
- Maldonado A, Bohoyo F, Galindo-Zaldivar FJ, Hernandez-Molina FJ, Lobo FJ, Lodolo E, Martos YM, Perez LF, Schreider AA, Somoza L. 2014.** A model of oceanic development by ridge jumping: opening of the Scotia Sea. *Global and Planetary Change* **123**: 152–173.
- Marwick J. 1948.** Lower Pliocene Mollusca from Otahuhu, Auckland. *New Zealand Geological Survey Paleontological Bulletin* **16**: 1–38.
- Miller TW, Coan EV, Chapman JW. 1999.** Rediscovery of the introduced, non-indigenous bivalve *Laternula marilina* (Reeve, 1860) in the northeastern Pacific. *The Veliger* **42**: 282–284.
- Mittre H. 1844.** Mémoire sur le genre *Anatina*. In: Guérin-Méneville, FE, ed. *Magasin de Zoologie, d’Anatomie Comparée et de Palaeontologie*: 1–18. Paris: Arthus Bertrand, pls 102–104.
- Morley SA, Hirse T, Thorne MAS, Pörtner HO, Peck LS. 2012.** Physiological plasticity, long term resistance or acclimation to temperature, in the Antarctic bivalve, *Laternula elliptica*. *Comparative Biochemistry and Physiology Part A: Molecular & Integrative Physiology* **162**: 16–21.

- Morley SA, Tan KS, Day RW, Martin SM, Pörtner HO, Peck LS. 2009.** Thermal dependency of burrowing in three species within the bivalve genus *Laternula*: a latitudinal comparison. *Marine Biology* **156**: 1977–1984.
- Morris S, Morris N. 1993.** New shells from the UAE's East Coast. *Tribulus* **3**: 5–8, 18–19.
- Morton B. 1973.** The biology and functional morphology of *Laternula rostrata* (Lamarck, 1818) (Bivalvia: Anomalodesmata: Pandoracea). *Biological Bulletin* **145**: 509–531.
- Morton, B. 1976.** The structure, mode of operation and variation in form of the shell of the Laternulidae (Bivalvia: Anomalodesmata: Pandoracea). *Journal of Molluscan Studies* **42**: 261–278.
- Nehrke G, Poigner H, Wilhelms-Dick D, Brey T, Abele D. 2012.** Coexistence of three calcium carbonate polymorphs in the shell of the Antarctic clam *Laternula elliptica*. *Geochemistry, Geophysics, Geosystems* **13**: Q05014.
- Okutani T. 2000.** *Marine mollusks in Japan*. Tokyo: Tokai University Press,
- Oliver PG. 1995.** Bivalvia. In: Dance SP, ed. *Seashells of eastern Arabia*. Dubai: Motivate Publishing, 194–281.
- Parras A, Griffin M. 2013.** Late Cretaceous (Campanian/Maastrichtian) freshwater to restricted marine mollusc fauna from the Loncoche Formation, Neuquén Basin, west-central Argentina. *Cretaceous Research* **40**: 190–206.
- Peck LS, Clark MS, Morley SA, Massey A, Rossetti H. 2009.** Animal temperature limits and ecological relevance: effects of size, activity and rates of change. *Functional Ecology* **23**: 248–256.
- Philippi RA. 1844.** Descriptiones testaceorum quorundam novorum, maxime chinensium. *Zeitschrift für Malakozoologie* **1**: 161–167.
- Pickard J. 1985.** The Holocene fossil marine macrofauna of the Vestfold Hills, East Antarctica. *Boreas* **14**: 189–202.
- Pilsbry HA. 1895.** *Catalogue of the marine mollusks of Japan with descriptions of new species and notes on others collected by Frederick Stearns*. Detroit: F. Stearns.
- Pilsbry HA. 1901.** New Japanese marine, land and fresh-water Mollusca. *Proceedings of the Academy of Natural Sciences of Philadelphia*. **53**: 385–408.
- Preston HB. 1905.** Descriptions of new species of marine shells from Ceylon. *Journal of Malacology* **12**: 1–8.
- Preston HB. 1914.** Mollusca from Chilka Lake on the east coast of India. *Records of the Indian Museum* **10**: 297–310.
- Preston HB. 1915.** A further report on Mollusca from Chilka Lake on the east coast of India. *Records of the Indian Museum* **11**: 289–310.
- Prezant RS, Shell RM, Laying WU. 2015.** Comparative shell microstructure of two species of tropical laternulid bivalves from Kungkabaen Bay, Thailand with afterthoughts on laternulid taxonomy. *American Malacological Bulletin* **33**: 1–12.
- Prezant RS, Sutcharit C, Chalermwat K, Kakhai N, Duangdee T, Dumrongrojwattana P. 2008.** Population study of *Laternula rostrata* (Bivalvia: Anomalodesmata: Laternulidae) in the mangrove sand flat of Kungkabaen Bay, Thailand, with notes on *Laternula anatina*. *Raffles Bulletin of Zoology Supplement* **18**: 57–73.
- Pufahl PK, James NP, Bone Y, Lukasik JJ. 2004.** Pliocene sedimentation in a shallow, cool-water, estuarine gulf, Murray Basin, South Australia. *Sedimentology* **51**: 997–1027.
- Quilty PG, Darragh TA, Gallagher SJ, Harding LA. 2016.** Pliocene Mollusca (Bivalvia, Gastropoda) from the Sørsdal Formation, Marine Plain, Vestfold Hills, East Antarctica: taxonomy and implications for Antarctic Pliocene palaeoenvironments. *Alcheringa* **40**: 556–582.
- Ralph R, Maxwell JGH. 1977.** Growth of two Antarctic Lamellibranchs – *Adamussium colbecki* and *Laternula elliptica*. *Marine Biology* **42**: 171–175.
- Reeve LA. 1860–1863. *Monograph of the genus Anatina*. *Conchologica Iconica volume 14*. London: Reeve, Benham & Reeve.
- Röding PF. 1798.** *Museum Boltenianum, pars secunda continens conchilia, sive Testacea univalvia, bivalvia et multivalvia*. Hamburg: JC Trappii,
- Rumpf [Rumphius] GE. 1705.** *D'Amboinsche Rariteitkamer, behelzende eene beschryvinge van allerhande zoo weeke als harde schaalvisschen, te weeten raare krabben, kreeften, en diergelyke zeedieren, als mede allerhande hoorntjes en schulpen, die men in d'Amboinsche zee vindt: daar beneven zommige mineraalen, gesteenten, en soorten van aarde, die in d'Amboinsche, en zommige omleggende eilanden gevonden worden*. Amsterdam, 1–340 + 1–43, 60 pls.
- Sartori AF. 2009.** *Comparative morphology and phylogeny of anomalodesmatan bivalves*. PhD thesis, University of Cambridge.
- Sartori AF, Ball AD. 2009.** Morphology and postlarval development of the ligament of *Thracia phaseolina* (Bivalvia: Thraciidae), with a discussion of model choice in allometric studies. *Journal of Molluscan Studies* **75**: 295–304.
- Sartori AF, Passos FD, Domaneschi O. 2006.** Arenophilic mantle glands in the Laternulidae (Bivalvia: Anomalodesmata) and their evolutionary significance. *Acta Zoologica* **87**: 265–272.
- Sato-Okoshi W, Okoshi K. 2008.** Characteristics of shell microstructure and growth analysis of the Antarctic bivalve *Laternula elliptica* from Lutzow-Holm Bay, Antarctica. *Polar Biology* **31**: 131–138.
- Savazzi E. 1990.** Shell biomechanics in the bivalve *Laternula Lethaia* **23**: 93–101.
- Scher HD, Whittaker JM, Williams SE, Latimer JC, Kordesch WEC, Delaney ML. 2015.** Onset of Antarctic Circumpolar current 30 million years ago as Tasmanian Gateway aligned with westerlies. *Nature* **523**: 580–583.
- Schnetler KI. 2001.** The Selandian (Paleocene) mollusc fauna from Copenhagen, Denmark: the Poul Harder 1920 collection. *Geology of Denmark Survey Bulletin* **37**.
- Sheppard C, Al-Husiani M, Al-Jamali F, Al-Yamani F, Baldwin R, Bishop J, et al., 2010.** The Gulf: a young sea in decline. *Marine Pollution Bulletin* **60**: 3–38.
- Smellie JL, Johnson JS, Nelson AE. 2013.** *Geological map of James Ross Island. 1. James Ross Island Volcanic Group (1:125,000 scale)*. BAS GEOMAP 2 Series, Sheet 5. Cambridge: British Antarctic Survey.

- Soot-Ryen T. 1952.** *Laternula elliptica* (King & Broderip, 1831) from the *Pecten* Conglomerate, Cockburn Island. *Arkiv för Zoologi* **4**: 163–164.
- Sowerby GB. 1834.** Characters of new genera and species of Mollusca and Conchifera, collected by Mr. Cuming. *Proceedings of the Zoological Society of London* **1834**: 87–89.
- Sowerby GB, II. 1839.** *A conchological manual*. London: GB Sowerby.
- Speden IG. 1962.** Fossiliferous Quaternary marine deposits in the McMurdo Sound region, Antarctica. *New Zealand Journal of Geology and Geophysics* **5**: 746–777.
- Spengler L. 1793.** Beskrivelse over et nyt Slagt af de toskallede Konkylier, forhen af mig kaldet *Chaena saa* og over det Linneiske Slagt *Mya*, hvilket noiere bestemmes, og inddeles i tvende Slagter. *Skrivter af Naturhistorie Selskabet* **3**: 16–51.
- Stilwell JD, Harwood DM, Whitehead JM. 2002.** Mid-Tertiary macroinvertebrate-rich clasts from the Battye Glacier Formation, Prince Charles Mountains, East Antarctica. *Antarctic Science* **14**: 69–73.
- Verheye ML, Backeljau T, d'Udekem d'Acoz C. 2017.** Locked in the icehouse: evolution of an endemic *Epimeria* (Amphipoda, Crustacea) species flock on the Antarctic shelf. *Molecular Phylogenetics and Evolution* **114**: 14–33.
- Waller CL, Overall A, Fitzcharles EM, Griffiths H. 2017.** First report of *Laternula elliptica* in the Antarctic intertidal zone. *Polar Biology* **40**: 227–230.
- Watson SA, Peck LS, Tyler PA, Southgate PC, Tan KS, Day RW, Morley SA. 2012.** Marine invertebrate skeleton size varies with latitude, temperature and carbonate saturation: Implications for global change and ocean acidification. *Global Change Biology* **18**: 3026–3038.
- Williams ST, Foster PG, Hughes C, Harper EM, Taylor JD, Littlewood DTJ, Dyal P, Hopkins KP, Briscoe AG. 2017.** Curious bivalves: systematic utility and unusual properties of anomalodesmatan mitochondrial genomes. *Molecular Phylogenetics and Evolution* **110**: 60–72.
- Williams ST, Smith LM, Herbert DG, Marshall BA, Warén A, Kiel S, Dyal P, Linse K, Vilvens C, Kano Y. 2013.** Cenozoic climate change and diversification on the continental shelf and slope: evolution of gastropod diversity in the family Solariellidae (Trochoidea). *Ecology and Evolution* **3**: 887–917.
- WoRMS (World Register of Marine Species). 2017.** Available at: <http://www.marinespecies.org/index.php> (accessed June 2017).
- Zachos JC, Dickens GR, Zeebe RE. 2008.** An early Cenozoic perspective on greenhouse warming and carbon-cycle dynamics. *Nature* **451**: 279–283.
- Zamorano JH, Duarte WE, Moreno CA. 1986.** Predation upon *Laternula elliptica* (Bivalvia, Anatinidae) – a field manipulation in South-Bay, Antarctica. *Polar Biology* **6**: 139–143.
- Zhuang Q, Cai Y. 1982.** Studies on the Laternulidae off the Chinese coast. *Oceanologia et Limnologia Sinica* **13**: 553–561.
- Zhuang S. 2005.** Influence of salinity, diurnal rhythm and day-length on feeding in *Laternula marilina* Reeve. *Aquaculture Research* **36**: 130–136.
- Zinsmeister WJ. 1979.** Biogeographic significance of the late Mesozoic and early Tertiary molluscan faunas of Seymour Island (Antarctic Peninsula) to the final breakup of Gondwanaland. In: Gray J, Boucot AJ, eds, *Historical biogeography, plate tectonics and the changing environment*. Corvallis: Oregon State University Press, 349–355.
- Zinsmeister WJ. 1982.** Late Cretaceous – Early Tertiary molluscan biogeography of the southern circum-Pacific. *Journal of Paleontology* **56**: 84–102.
- Zinsmeister WJ. 1984.** Late Eocene bivalves (Mollusca) from the La Meseta Formation, collected during the 1974–1975 joint Argentine–American expedition to Seymour Island, Antarctic Peninsula. *Journal of Paleontology* **58**: 1497–1527.

## APPENDIX

Critical assessment of the living species of Laternulidae and their synonyms. Type localities are given where known. Note that the number of considered valid species and nomenclature differs from Huber (2010) and WoRMS. This classification will evolve as more samples are included in molecular analyses.

## LATERNULIDAE

Genus *Exolaternula* Habe, 1977 type species: *Anatina truncata* Lamarck, 1818 = *L. spengleri* (Gmelin, 1792) = *L. rostrata* (Sowerby, 1839). *Lithodesma* present.

***Exolaternula spengleri* (Gmelin, 1792)**

*Solen spengleri* Gmelin, 1792: 3228.

**Synonyms:** *Mya anserifera* Spengler, 1793: table 2, fig. 8, holotype NHMD 116367 (Gmelin's name is based on this specimen and figure), Nicobar Islands; *Anatina truncata* auct. non Lamarck 1818; *Anatina rostrata*

(G.B. Sowerby II 1839); *Anatina limicola* Reeve, 1863, Japan; *Anatina elegans* Philippi, 1844, China; *Anatina bernicula* Lamy, 1934, Tongatabu.

**Remarks:** Reeve, (1860) used the name *A. anserifera* for a figured specimen from Tasmania now considered to be *Laternula tasmanica*, leading to citations of the former in southern Australia (e.g. Morton, 1976).

**Distribution:** Sri Lanka, Southeast Asia, northern Australia, Philippines, China, southern Japan (Ryukyu Islands).



***Exolaternula liautaudi* (Mittre, 1844)**

*Anatina liautaudi* Mittre, 1844: 16, pl. 104, holotype MNHN-IM- 2000-33234. Manila, Philippines. Image: <https://science.mnhn.fr/institution/mnhn/collection/im/item/2000-33234>

**Synonyms:** *Laternula limicola* auct. non Reeve, 1863; *L. navicula* auct. non Reeve, 1863; *L. marilina* auct. non Reeve, 1860; *L. gracilis* auct. non Reeve, 1860; *Anatina kamakurana* Pilsbry, 1895, Kamakura, Japan; *Anatina pechiliensis* Grabau & King, 1928, Peitaiho, NW China; *Laternula nanhaiensis* Zhuang & Cai, 1982, Hepu, Guangxi.

**Remarks:** There has been much nomenclatural confusion concerning this species; in Japanese, Chinese and Russian literature it is often cited as *L. marilina*, an Australian species lacking a lithodesma and now synonymized with *L. gracilis*. Comparison of type specimens shows that *L. liautaudi*, originally described from the Philippines, is the earliest name.

**Distribution:** Northern Philippines, China, Taiwan, Korea, Japan and eastern Russia (Peter the Great Bay), exotic to north-west America.

***Exolaternula erythraea* (Morris & Morris, 1993)**

*Laternula* (*Exolaternula*) *erythraea* Morris & Morris, 1993: 8, 19, holotype NHMUK 1992175, Fujairah, United Arab Emirates.

**Remarks:** *L. erythraensis* was used in error for *L. erythraea* (e.g. Oliver, 1995; Feulner & Hornby, 2006).

**Distribution:** Arabian Gulf, Gulf of Oman.

Genus ***Laternula*** Röding, 1798, type species: *Solen anatinus* Linnaeus, 1758. Synonym: *Laternulina* Habe 1952, type species *Anatina japonica* Lischke, 1872. Lithodesma absent in adult.

***Laternula anatina* (Linnaeus, 1758)**

*Solen anatinus* Linnaeus 1758: 673.

**Synonyms:** *Anatina subrostrata* Lamarck, 1818; *Anatina hispidula* Cuvier, 1829; *Anatina amphora* Reeve, 1863, Island of Burias, Philippines; *Anatina cumingi* Reeve, 1863, Amboina; *Anatina eximia* Reeve, 1863; *Anatina flexuosa* Reeve, 1863, Japan; *Anatina labiata* Reeve, 1863, Ceylon; *Anatina siphonata* Reeve, 1863, Borneo.

**Remarks:** No type material for *S. anatinus* exists. Linnaeus based the name on the figure in Rumphius (1705: pl. 45 f O and subsequent editions) with locality given as 'O. Asiatici'. The figure is poor but has the upturned posterior 'beak' of shells identified as this species. It is also figured in Chemnitz (1782: 62, pl. 6, figs 46–48) and according to Lamy (1934) Lamarck (1818) based his name *A. subrostrata* on these figures.

**Distribution:** East Africa (rare), Red Sea, SE Asia, NW Australia, Philippines, China, Okinawa, southern Japan. Exotic to eastern Mediterranean.

***Laternula elliptica* (King, 1832)**

*Anatina elliptica* King, 1832: 335, holotype NHMUK 197528, South Shetland Islands.

**Synonym:** *Anatina prismatica* Sowerby, 1834, South Shetland Islands.

**Remarks:** Usually cited as described by Broderip & King (1832) but see Coan, Petit & Zelaya (2011) for authorship.

**Distribution:** Circum-Antarctica, Kerguelen, South Georgia, South Shetland Islands.

***Laternula boschasina* (Reeve, 1860)**

*Anatina boschasina* Reeve, 1860, pl. 2, fig. 13, syntypes NHMUK 197513/1–3, Negros Island, Philippines.

**Remarks:** Our sequenced species from Darwin is much smaller than the syntypes but has a similar deep sinus, commarginal folds and brown periostracal margin.

**Distribution:** Uncertain but includes south-east Asia and northern Australia.

***Laternula bullata* (Reeve, 1863)**

*Anatina bullata* Reeve, 1863, pl. 1 fig. 3, syntypes NHMUK 197513/1–3, Sibonga, Zebu, Philippines.

**Remarks:** The species sequenced from Singapore (sometimes called *L. boschasina*) is similar to the type with a rounded anterior, tapering posterior and shallow pallial sinus.

**Distribution:** Southeast Asia.

***Laternula corrugata* (Reeve, 1863)**

*Anatina corrugata* Reeve, 1863, pl. 4, fig. 25, NHMUK 197523/1–2, Ticao Island, Philippines.

**Remarks:** The species sequenced from Shark Bay, Western Australia, is broadly similar to syntypes of this species but may be distinct.

**Distribution:** Philippines, ?Western Australia.

***Laternula creccina* (Reeve, 1860)**

*Anatina creccina* Reeve, 1860, pl. 2 fig. 12, NHMUK 197512/1–2, Adelaide, Australia.

**Synonyms:** *Anatina vagina* Reeve, 1863, Moreton Bay, Australia; *Anatina attenuata* Reeve, 1863, Sydney, Australia.

**Remarks:** The Moreton Bay locality for *A. vagina* is probably erroneous.

**Distribution:** South-eastern, southern and south-western Australia.



***Laternula gracilis* (Reeve, 1860)**

*Anatina gracilis* Reeve, 1860, pl. 2 fig. 9, NHMUK 19759/1–3, Moreton Bay, Queensland.

*Synonyms:* *Anatina marilina* Reeve, 1860, Australia; *Anatina recta* Reeve, 1863, Port Phillip, Victoria, Australia; ?*Anatina tasmanica* Reeve, 1863, Tasmania.

*Remarks:* Molecular analysis indicates that specimens identified as three species above are monospecific with *L. gracilis* taking priority. The status of the largest species, *L. tasmanica*, is uncertain but shares characters with *L. gracilis*.

*Distribution:* Eastern Australia from southern Queensland to Victoria and Tasmania.

***Laternula impura* (Pilsbry 1901)**

*Anatina impura* Pilsbry, 1901: 208, pl. 19 fig. 9, syn-types ANSP 68536, Sagami, Japan.

*Remarks:* The status of this species is uncertain.

*Distribution:* Southern Japan

***Laternula japonica* Lischke, 1872:** 107; fig. 1874, pl. 9, figs 7–10, types not located, Tokyo, Japan.

*Remarks:* This species is often synonymized with *L. anatina* but our molecular results indicate it is genetically distinct. An earlier name may be *Anatina blainvillei* Reeve, 1863, pl. 3, fig 17, Island of Burias, Philippines.

*Distribution:* Southern Japan.

***Laternula laterna* (Lamarck, 1818)**

*Anatina laterna* Lamarck 1818: 463, lectotype MNHG 1082/33 selected Beu (2004: 184, fig. 18C–E).

*Synonyms:* *Anatina cistella* Reeve, 1863, Moluccas; *Anatina constricta*, Reeve, 1863, northern Australia; *A. valenciennesii* Reeve, 1863, China.

*Remarks:* The lectotype is a large specimen with a short posterior beak and differs from the Lamarckian syntype specimens (now paralectotypes) labelled *A. laterna* in MNHN Paris (Lamy, 1934, pl. 1, fig. 7).

*Distribution:* Northern Australia, Indonesia. Beu (2004) wrongly states, citing Lamprell & Healy (1998: 214), that the distribution ranges from southern Western Australia to South Australia, Victoria, Tasmania and New South Wales.

***Laternula navicula* (Reeve, 1863)**

*Anatina navicula* Reeve, 1863, pl. 4 fig. 21, NHMUK 197520/1–3, type locality not cited.

*Synonyms:* *Anatina barkudaensis* Preston, 1915, Lake Chilka, India; *Anatina barkulensis* Preston, 1915, Lake Chilka; *Anatina granulosa* Preston, 1914, Lake Chilka; *Anatina smithi* Preston, 1905, Sri Lanka.

*Distribution:* NW Indian Ocean, Arabian Sea, India, Sri Lanka, Andaman Sea.

***Laternula* sp.**

*Remarks:* This species, collected in Kungkraben Bay, Thailand, and called *L. corrugata* by Prezant *et al.* (2008) and then changed to *L. anatina* Prezant *et al.* (2015), is neither of these taxa. It is broadly similar in shape to *L. bullata* Reeve, 1860 but molecularly distinct from Singapore specimens that we identify as that species.

The following species are of uncertain status; all are small shells and probably juveniles.

*Anatina faba* Reeve, 1863, pl. 4, fig. 22, Brisbane, type not located. *Anatina argentea* Reeve, 1863, pl. 4, fig. 29, NHMUK 197526. *Anatina prolongata* Reeve, 1863, pl. 4, fig. 28, Port Curtis, Queensland, type not located.
